# Supplementary material
Source: Frontiers journal article supplement (https://www.frontiersin.org/articles/511644)
Supplement: Table_1.pdf [file Table_1.pdf]

Table S1. The detailed information of published trials

| Study                                  | Phase  | Design                                                | Publication form                  | Reference |
|----------------------------------------|--------|-------------------------------------------------------|-----------------------------------|-----------|
| As neoadjuvant treatment               |        |                                                       |                                   |           |
| NCT03044613                            | II/III | Non-randomized, single-arm, open-label                | Conference abstract               | 22        |
| NCT02844075                            | II     | Single-arm, open-label                                | Conference abstract               | 23        |
| NCT03490292                            | I/II   | Non-randomized, single-arm, open-label                | Conference abstract               | 24        |
| NCT03087864                            | II/III | Single-arm, open-label                                | Conference abstract               | 25        |
| As adjuvant treatment                  |        |                                                       |                                   |           |
| NCT02639065                            | II     | Single-arm, open-label, multi-center                  | Conference abstract               | 35        |
| As first-line treatment                |        |                                                       |                                   |           |
| NCT03187314                            | II     | Single-arm, open-label                                | Conference abstract               | 37        |
| NCT03222440                            | Ib     | Non-randomized, single-arm, open-label, single center | Conference abstract               | 38        |
| NCT03469557                            | II     | Non-randomized, single-arm, open-label                | Conference abstract               | 41        |
| NCT02658214                            | Ib     | Non-randomized, single-arm, open-label                | Conference abstract               | 43        |
| NCT03603756                            | II     | Non-randomized, single-arm, open-label                | Conference abstract               | 44        |
| As second-line or subsequent treatment |        |                                                       |                                   |           |
| ATTRACTION-1                           | II     | Single-arm, open-label, multi-center                  | Full text                         | 47        |
| ATTRACTION-3 (NCT02569242)             | III    | Randomized, controlled, open-label, multi-center      | Full text and conference abstract | 48, 49    |
| KEYNOTE-028 (NCT02054806)              | Ib     | Single-arm, open-label                                | Full text                         | 16        |
| KEYNOTE-180 (NCT02559687)              | II     | Single-arm, open-label                                | Conference abstract               | 50        |
| KEYNOTE-181 (NCT02564263)              | III    | Randomized, controlled, open-label                    | Conference abstract               | 51, 52    |
| NCT02742935                            | I      | Non-randomized, single-arm, open-label, single center | Conference abstract               | 53        |
| NCT03099382                            | III    | Randomized, controlled, open-label                    | Conference oral presentation      | 54        |
| NCT02915432                            | Ib/II  | Non-randomized, single-arm, open-label, multi-center  | Conference abstract               | 55        |
